# Supplementary material
Source: MDPI journal article supplement (https://www.mdpi.com/2073-4441/10/11/1695)

**Figure S1.** Comparisons of predicted and observed water quality constituents in the surface layer.

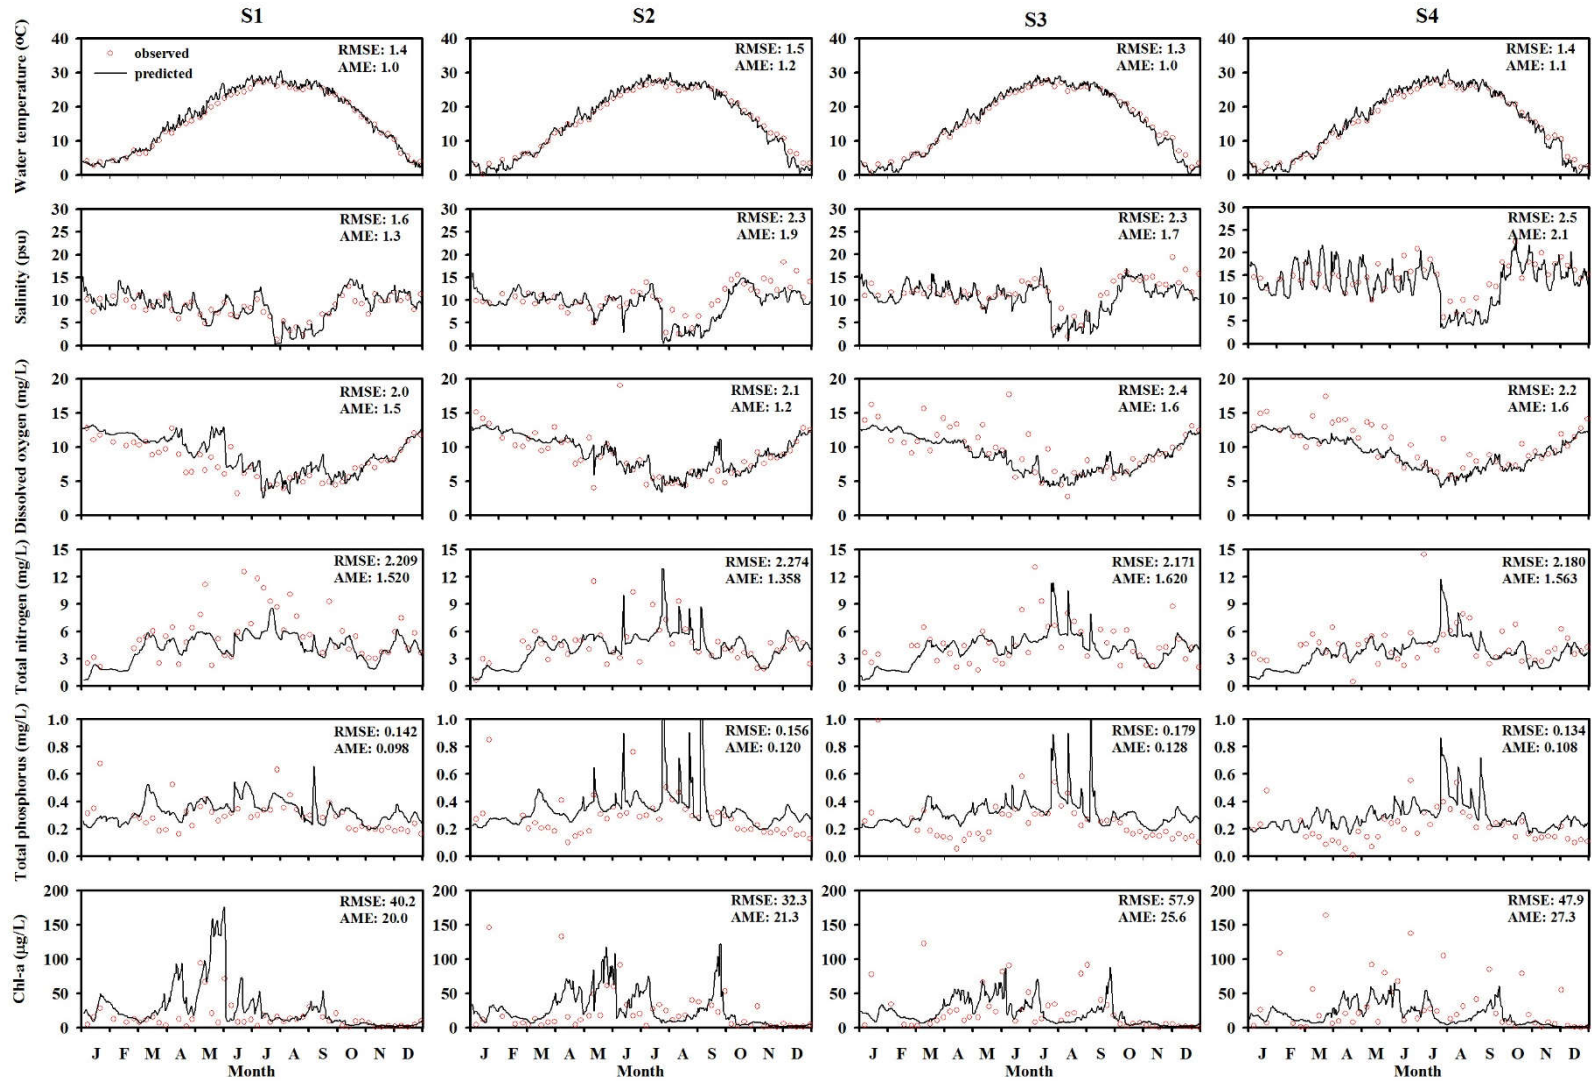

**Figure S2.** Comparisons of predicted and observed water quality constituents in the bottom layer.

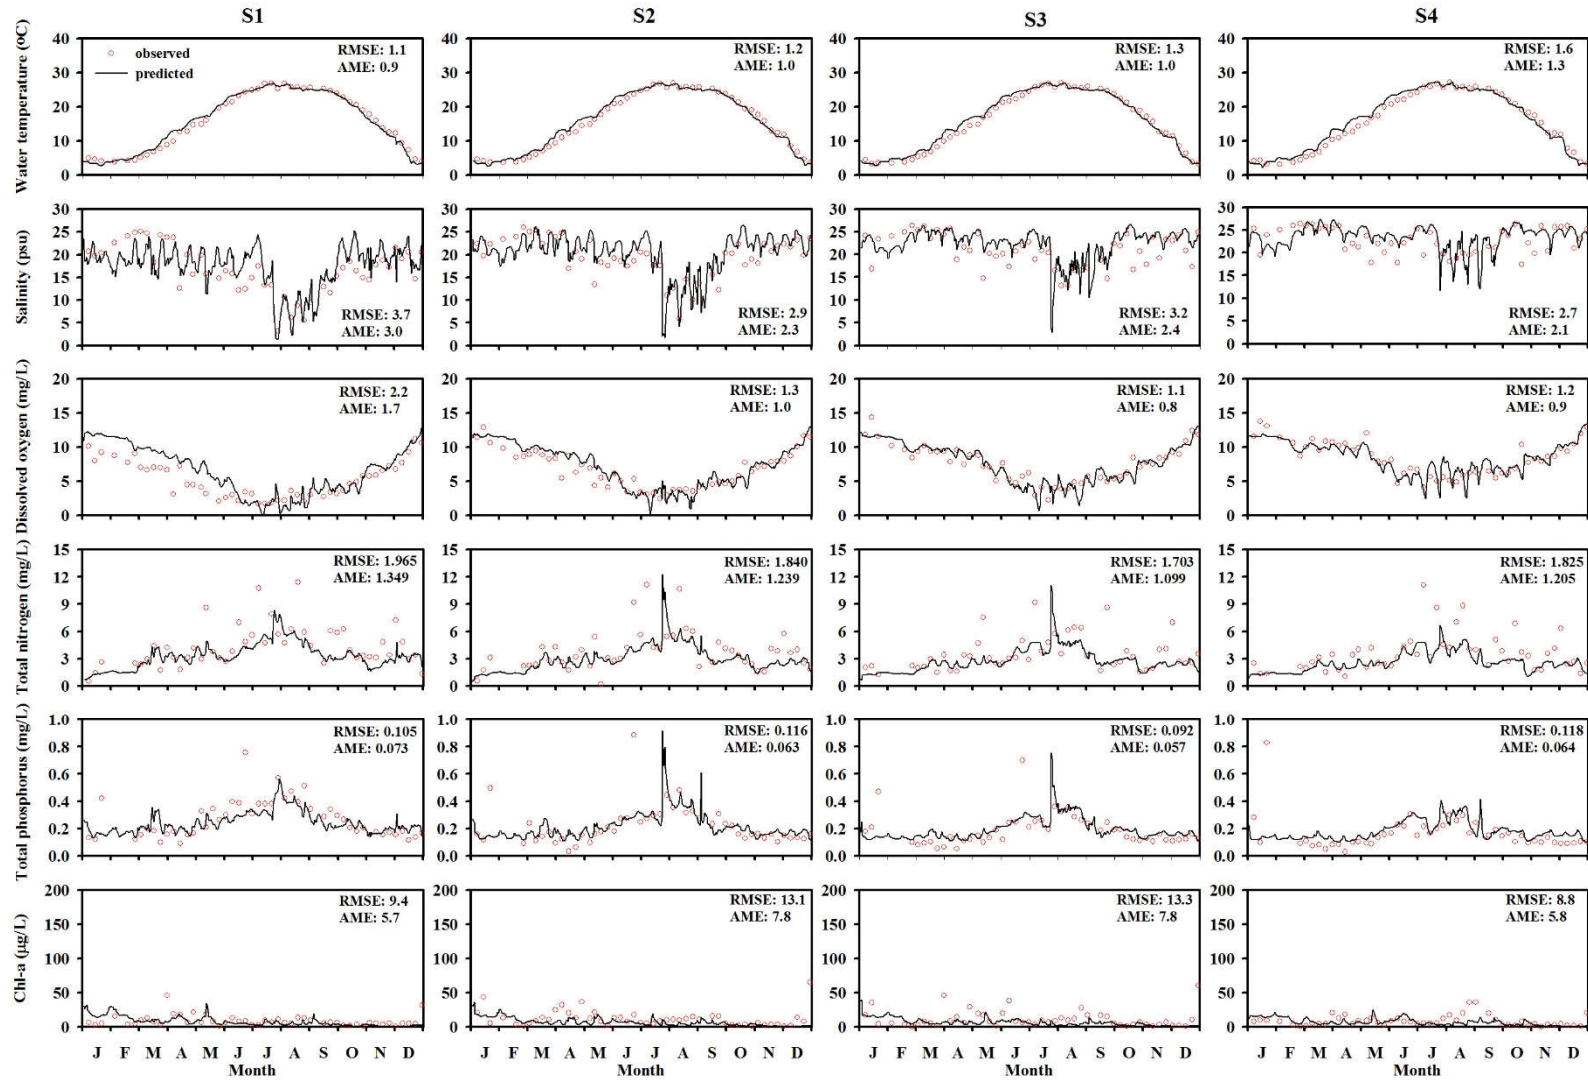

Supplement: s1 [file s1]
